# Supplementary material for: The Physiological Basis of Improved Heat Tolerance in Selected Emmer-Derived Hexaploid Wheat Genotypes
Source: PubMed Central journal article supplement (PMC8544522; doi:10.3389/fpls.2021.739246), 2021-10-07
Supplement: Data_Sheet_1.pdf [file Data_Sheet_1.pdf]

# Supplementary material

## The physiological basis of improved heat tolerance in selected emmer-derived hexaploid wheat genotypes

Smi Ullah<sup>1</sup>, Richard Trethowan<sup>1,2</sup> and Helen Bramley<sup>1</sup>

<sup>1</sup>School of Life and Environmental Sciences, Plant Breeding Institute, Sydney Institute of Agriculture, The University of Sydney, Narrabri 2390, NSW, Australia

<sup>2</sup>School of Life and Environmental Sciences, Plant Breeding Institute, Sydney Institute of Agriculture, University of Sydney, Cobbitty 2570, NSW, Australia

Supplementary Table 1; List of plant material used in field trials during 2015 and 2016.

| 2015 ID   | 2016 ID     | DESIGNATION                  | PEDIGREE                                                    |
|-----------|-------------|------------------------------|-------------------------------------------------------------|
| 1         | 483         | SUNTOP                       | -                                                           |
| 2         | 485         | SPITFIRE                     | -                                                           |
| 3         | 478         | PBW502                       | -                                                           |
| 4         | 479         | PBW550                       | -                                                           |
| 5         | 476         | DBW16                        | -                                                           |
| 6         | 477         | DBW17                        | -                                                           |
| 7         | 475         | BERKUT                       | -                                                           |
| 8         | 480         | SOKOLL                       | -                                                           |
| 9         | 474         | 2-<br>49/CUNNINGHAM//KENNEDY | -                                                           |
| 10        | 543         | SUNLIN                       | -                                                           |
| 11        | 487         | EGA GREGORY                  | -                                                           |
| 12        | 8           | PBI09C002-BC-DH16            | BERKUT/2/BERKUT / 35891 M500281                             |
| 13        | 32          | PBI09C004-BC-DH63            | BERKUT/2/BERKUT / 35883 M500110                             |
| 14        | 318         | PBI09C048-BC-DH28            | DBW17 /2/DBW17 / 21758 KC75                                 |
| 15        | 80          | PBI09C009-BC-DH62            | SOKOLL/2/SOKOLL / 35888 M 500132                            |
| 16        | 233         | PBI09C038-BC-DH3             | PBW550 /2/PBW550 / 18293 KC75                               |
| 17        | 86          | PBI09C009-BC-DH72            | SOKOLL/2/SOKOLL / 35888 M 500132                            |
| 18        | 241         | PBI09C038-BC-DH18            | PBW550 /2/PBW550 / 18293 KC75                               |
| 19        | 271         | PBI09C043-BC-DH26            | DBW16 /2/DBW16 / 21758 KC75                                 |
| 20        | 39          | PBI09C004-BC-DH88            | BERKUT/2/BERKUT / 35883 M500110                             |
| <b>21</b> | <b>227</b>  | <b>PBI09C035-BC-DH39</b>     | <b>PBW502 /2/PBW502 / 19385 KC75</b>                        |
|           | <b>(G1)</b> |                              |                                                             |
| 22        | 2           | PBI09C001-BC-DH43            | BERKUT/2/BERKUT / 35880 M C18644                            |
| 23        | 238         | PBI09C038-BC-DH13            | PBW550 /2/PBW550 / 18293 KC75                               |
| 24        | 6           | PBI09C002-BC-DH3             | BERKUT/2/BERKUT / 35891 M500281                             |
| 25        | 79          | PBI09C009-BC-DH60            | SOKOLL/2/SOKOLL / 35888 M 500132                            |
| 26        | 312         | PBI09C048-BC-DH16            | DBW17 /2/DBW17 / 21758 KC75                                 |
| 27        | 49          | PBI09C004-BC-DH116           | BERKUT/2/BERKUT / 35883 M500110                             |
| 28        | 188         | PBI09C034-BC-DH4             | PBW502 /2/PBW502 / 21758 KC75                               |
| 29        | 55          | PBI09C008-BC-DH5             | SOKOLL/2/SOKOLL / 35883 M500110                             |
| 30        | 296         | PBI09C045-BC-DH16            | DBW16 /2/DBW16 / 18341 KC75                                 |
| 31        | 225         | PBI09C035-BC-DH35            | PBW502 /2/PBW502 / 19385 KC75                               |
| 32        | 262         | PBI09C039-BC-DH79            | PBW550 /2/PBW550 / 18343 KC75                               |
| 33        | 285         | PBI09C043-BC-DH62            | DBW16 /2/DBW16 / 21758 KC75                                 |
| 34        | 320         | PBI09C048-BC-DH35            | DBW17 /2/DBW17 / 21758 KC75                                 |
| 35        | 57          | PBI09C008-BC-DH11            | SOKOLL/2/SOKOLL / 35883 M500110                             |
| 36        | 317         | PBI09C048-BC-DH25            | DBW17 /2/DBW17 / 21758 KC75                                 |
| 37        | 4           | PBI09C001-BC-DH70            | BERKUT/2/BERKUT / 35880 M C18644                            |
| 38        | 308         | PBI09C048-BC-DH11            | DBW17 /2/DBW17 / 21758 KC75                                 |
| 39        | 185         | PBI09C034-BC-DH1             | PBW502 /2/PBW502 / 21758 KC75                               |
| 40        | 273         | PBI09C043-BC-DH35            | DBW16 /2/DBW16 / 21758 KC75                                 |
| 41        | 44          | PBI09C004-BC-DH105           | BERKUT/2/BERKUT / 35883 M500110                             |
| 42        | 62          | PBI09C009-BC-DH13            | SOKOLL/2/SOKOLL / 35888 M 500132                            |
| 43        | 261         | PBI09C039-BC-DH77            | PBW550 /2/PBW550 / 18343 KC75                               |
| 44        | 52          | PBI09C004-BC-DH127           | BERKUT/2/BERKUT / 35883 M500110                             |
| 45        | 61          | PBI09C009-BC-DH12            | SOKOLL/2/SOKOLL / 35888 M 500132                            |
| 46        | 298         | PBI09C045-BC-DH22            | DBW16 /2/DBW16 / 18341 KC75                                 |
| 47        | 224         | PBI09C035-BC-DH33            | PBW502 /2/PBW502 / 19385 KC75                               |
| 48        | 165         | PBI09C028-BC-DH21            | WAXWING*2/KIRITATI /3/WAXWING*2/KIRITATI /2/ 35880 M C18644 |
| 49        | 306         | PBI09C048-BC-DH9             | DBW17 /2/DBW17 / 21758 KC75                                 |
| 50        | 193         | PBI09C034-BC-DH11            | PBW502 /2/PBW502 / 21758 KC75                               |
| 51        | 230         | PBI09C035-BC-DH43            | PBW502 /2/PBW502 / 19385 KC75                               |
| 52        | 226         | PBI09C035-BC-DH38            | PBW502 /2/PBW502 / 19385 KC75                               |
| 53        | 96          | PBI09C009-BC-DH94            | SOKOLL/2/SOKOLL / 35888 M 500132                            |
| 54        | 287         | PBI09C043-BC-DH64            | DBW16 /2/DBW16 / 21758 KC75                                 |

|     |             |                          |                                                                    |
|-----|-------------|--------------------------|--------------------------------------------------------------------|
| 55  | 275         | PBI09C043-BC-DH42        | DBW16 /2/DBW16 / 21758 KC75                                        |
| 56  | 186         | PBI09C034-BC-DH2         | PBW502 /2/PBW502 / 21758 KC75                                      |
| 57  | 133         | PBI09C026-BC-DH37        | WAXWING*2/KIRITATI /3/WAXWING*2/KIRITATI /2/ 35888 M 500132        |
| 58  | 201         | PBI09C034-BC-DH37        | PBW502 /2/PBW502 / 21758 KC75                                      |
| 59  | 272         | PBI09C043-BC-DH32        | DBW16 /2/DBW16 / 21758 KC75                                        |
| 60  | 20          | PBI09C004-BC-DH27        | BERKUT/2/BERKUT / 35883 M500110                                    |
| 61  | 288         | PBI09C043-BC-DH66        | DBW16 /2/DBW16 / 21758 KC75                                        |
| 62  | 284         | PBI09C043-BC-DH61        | DBW16 /2/DBW16 / 21758 KC75                                        |
| 63  | 156         | PBI09C026-BC-DH96        | WAXWING*2/KIRITATI /3/WAXWING*2/KIRITATI /2/ 35888 M 500132        |
| 64  | 177         | PBI09C028-BC-DH42        | WAXWING*2/KIRITATI /3/WAXWING*2/KIRITATI /2/ 35880 M C18644        |
| 65  | 319         | PBI09C048-BC-DH31        | DBW17 /2/DBW17 / 21758 KC75                                        |
| 66  | 12          | PBI09C003-BC-DH3         | BERKUT/2/BERKUT / 35879 M C18643                                   |
| 67  | 85          | PBI09C009-BC-DH70        | SOKOLL/2/SOKOLL / 35888 M 500132                                   |
| 68  | 216         | PBI09C035-BC-DH16        | PBW502 /2/PBW502 / 19385 KC75                                      |
| 69  | 294         | PBI09C045-BC-DH12        | DBW16 /2/DBW16 / 18341 KC75                                        |
| 70  | 83          | PBI09C009-BC-DH67        | SOKOLL/2/SOKOLL / 35888 M 500132                                   |
| 71  | 309         | PBI09C048-BC-DH13        | DBW17 /2/DBW17 / 21758 KC75                                        |
| 72  | 88          | PBI09C009-BC-DH77        | SOKOLL/2/SOKOLL / 35888 M 500132                                   |
| 73  | 134         | PBI09C026-BC-DH41        | WAXWING*2/KIRITATI /3/WAXWING*2/KIRITATI /2/ 35888 M 500132        |
| 74  | 295         | PBI09C045-BC-DH14        | DBW16 /2/DBW16 / 18341 KC75                                        |
| 75  | 200         | PBI09C034-BC-DH36        | PBW502 /2/PBW502 / 21758 KC75                                      |
| 76  | 18          | PBI09C004-BC-DH16        | BERKUT/2/BERKUT / 35883 M500110                                    |
| 77  | 58          | PBI09C008-BC-DH13        | SOKOLL/2/SOKOLL / 35883 M500110                                    |
| 78  | 169         | PBI09C028-BC-DH30        | WAXWING*2/KIRITATI /3/WAXWING*2/KIRITATI /2/ 35880 M C18644        |
| 79  | 256         | PBI09C039-BC-DH61        | PBW550 /2/PBW550 / 18343 KC75                                      |
| 80  | 113         | PBI09C026-BC-DH5         | WAXWING*2/KIRITATI /3/WAXWING*2/KIRITATI /2/ 35888 M 500132        |
| 81  | 98          | PBI09C009-BC-DH99        | SOKOLL/2/SOKOLL / 35888 M 500132                                   |
| 82  | 40          | PBI09C004-BC-DH89        | BERKUT/2/BERKUT / 35883 M500110                                    |
| 83  | 215         | PBI09C035-BC-DH15        | PBW502 /2/PBW502 / 19385 KC75                                      |
| 84  | 13          | PBI09C003-BC-DH4         | BERKUT/2/BERKUT / 35879 M C18643                                   |
| 85  | 107         | PBI09C021-BC-DH9         | T.DICOCCONP194625/AE.SUARROSA(372)/2/3*PASTOR                      |
| 86  | 171         | PBI09C028-BC-DH33        | /4/T.DICOCCONP194625/AE.SUARROSA(372)/2/3*PASTOR /3/ 35883 M500110 |
| 87  | <b>196</b>  | <b>PBI09C034-BC-DH22</b> | <b>PBW502 /2/PBW502 / 21758 KC75</b>                               |
|     | <b>(G2)</b> |                          |                                                                    |
| 88  | 229         | PBI09C035-BC-DH42        | PBW502 /2/PBW502 / 19385 KC75                                      |
| 89  | 263         | PBI09C039-BC-DH83        | PBW550 /2/PBW550 / 18343 KC75                                      |
| 90  | 159         | PBI09C026-BC-DH115       | WAXWING*2/KIRITATI /3/WAXWING*2/KIRITATI /2/ 35888 M 500132        |
| 91  | 33          | PBI09C004-BC-DH70        | BERKUT/2/BERKUT / 35883 M500110                                    |
| 92  | 158         | PBI09C026-BC-DH101       | WAXWING*2/KIRITATI /3/WAXWING*2/KIRITATI /2/ 35888 M 500132        |
| 93  | 179         | PBI09C028-BC-DH46        | WAXWING*2/KIRITATI /3/WAXWING*2/KIRITATI /2/ 35880 M C18644        |
| 94  | 141         | PBI09C026-BC-DH51        | WAXWING*2/KIRITATI /3/WAXWING*2/KIRITATI /2/ 35888 M 500132        |
| 95  | 220         | PBI09C035-BC-DH23        | PBW502 /2/PBW502 / 19385 KC75                                      |
| 96  | 252         | PBI09C039-BC-DH52        | PBW550 /2/PBW550 / 18343 KC75                                      |
| 97  | 54          | PBI09C008-BC-DH3         | SOKOLL/2/SOKOLL / 35883 M500110                                    |
| 98  | 301         | PBI09C048-BC-DH1         | DBW17 /2/DBW17 / 21758 KC75                                        |
| 99  | 199         | PBI09C034-BC-DH32        | PBW502 /2/PBW502 / 21758 KC75                                      |
| 100 | 228         | PBI09C035-BC-DH40        | PBW502 /2/PBW502 / 19385 KC75                                      |
| 101 | 249         | PBI09C039-BC-DH42        | PBW550 /2/PBW550 / 18343 KC75                                      |
| 102 | 221         | PBI09C035-BC-DH29        | PBW502 /2/PBW502 / 19385 KC75                                      |
| 103 | 197         | PBI09C034-BC-DH26        | PBW502 /2/PBW502 / 21758 KC75                                      |
| 104 | 266         | PBI09C039-BC-DH89        | PBW550 /2/PBW550 / 18343 KC75                                      |
| 105 | 138         | PBI09C026-BC-DH48        | WAXWING*2/KIRITATI /3/WAXWING*2/KIRITATI /2/ 35888 M 500132        |
| 106 | 245         | PBI09C039-BC-DH13        | PBW550 /2/PBW550 / 18343 KC75                                      |
| 107 | 132         | PBI09C026-BC-DH35        | WAXWING*2/KIRITATI /3/WAXWING*2/KIRITATI /2/ 35888 M 500132        |
| 108 | 222         | PBI09C035-BC-DH30        | PBW502 /2/PBW502 / 19385 KC75                                      |
| 109 | 119         | PBI09C026-BC-DH12        | WAXWING*2/KIRITATI /3/WAXWING*2/KIRITATI /2/ 35888 M 500132        |
| 110 | 212         | PBI09C035-BC-DH10        | PBW502 /2/PBW502 / 19385 KC75                                      |
| 111 | 130         | PBI09C026-BC-DH32        | WAXWING*2/KIRITATI /3/WAXWING*2/KIRITATI /2/ 35888 M 500132        |
| 112 | 203         | PBI09C034-BC-DH40        | PBW502 /2/PBW502 / 21758 KC75                                      |
| 113 | 131         | PBI09C026-BC-DH33        | WAXWING*2/KIRITATI /3/WAXWING*2/KIRITATI /2/ 35888 M 500132        |
| 114 | 205         | PBI09C034-BC-DH42        | PBW502 /2/PBW502 / 21758 KC75                                      |
| 115 | 255         | PBI09C039-BC-DH57        | PBW550 /2/PBW550 / 18343 KC75                                      |
| 116 | 127         | PBI09C026-BC-DH25        | WAXWING*2/KIRITATI /3/WAXWING*2/KIRITATI /2/ 35888 M 500132        |
| 117 | 184         | PBI09C028-BC-DH56        | WAXWING*2/KIRITATI /3/WAXWING*2/KIRITATI /2/ 35880 M C18644        |
| 118 | 175         | PBI09C028-BC-DH40        | WAXWING*2/KIRITATI /3/WAXWING*2/KIRITATI /2/ 35880 M C18644        |
| 119 | 97          | PBI09C009-BC-DH96        | SOKOLL/2/SOKOLL / 35888 M 500132                                   |
| 120 | 214         | PBI09C035-BC-DH14        | PBW502 /2/PBW502 / 19385 KC75                                      |
| 121 | 153         | PBI09C026-BC-DH89        | WAXWING*2/KIRITATI /3/WAXWING*2/KIRITATI /2/ 35888 M 500132        |
| 122 | 218         | PBI09C035-BC-DH18        | PBW502 /2/PBW502 / 19385 KC75                                      |
| 123 | 142         | PBI09C026-BC-DH53        | WAXWING*2/KIRITATI /3/WAXWING*2/KIRITATI /2/ 35888 M 500132        |
| 124 | 22          | PBI09C004-BC-DH33        | BERKUT/2/BERKUT / 35883 M500110                                    |
| 125 | 178         | PBI09C028-BC-DH45        | WAXWING*2/KIRITATI /3/WAXWING*2/KIRITATI /2/ 35880 M C18644        |
| 126 | 121         | PBI09C026-BC-DH14        | WAXWING*2/KIRITATI /3/WAXWING*2/KIRITATI /2/ 35888 M 500132        |
| 127 | 125         | PBI09C026-BC-DH20        | WAXWING*2/KIRITATI /3/WAXWING*2/KIRITATI /2/ 35888 M 500132        |
| 128 | 29          | PBI09C004-BC-DH60        | BERKUT/2/BERKUT / 35883 M500110                                    |
| 129 | 128         | PBI09C026-BC-DH26        | WAXWING*2/KIRITATI /3/WAXWING*2/KIRITATI /2/ 35888 M 500132        |
| 130 | 293         | PBI09C045-BC-DH11        | DBW16 /2/DBW16 / 18341 KC75                                        |
| 131 | 323         | PBI09C048-BC-DH38        | DBW17 /2/DBW17 / 21758 KC75                                        |
| 132 | 140         | PBI09C026-BC-DH50        | WAXWING*2/KIRITATI /3/WAXWING*2/KIRITATI /2/ 35888 M 500132        |
| 133 | 173         | PBI09C028-BC-DH35        | WAXWING*2/KIRITATI /3/WAXWING*2/KIRITATI /2/ 35880 M C18644        |
| 134 | 274         | PBI09C043-BC-DH39        | DBW16 /2/DBW16 / 21758 KC75                                        |
| 135 | 126         | PBI09C026-BC-DH24        | WAXWING*2/KIRITATI /3/WAXWING*2/KIRITATI /2/ 35888 M 500132        |
| 136 | 95          | PBI09C009-BC-DH93        | SOKOLL/2/SOKOLL / 35888 M 500132                                   |
| 137 | 112         | PBI09C026-BC-DH4         | WAXWING*2/KIRITATI /3/WAXWING*2/KIRITATI /2/ 35888 M 500132        |
| 138 | 81          | PBI09C009-BC-DH65        | SOKOLL/2/SOKOLL / 35888 M 500132                                   |

|     |     |                   |                                                             |
|-----|-----|-------------------|-------------------------------------------------------------|
| 139 | 239 | PBI09C038-BC-DH14 | PBW550 /2/PBW550 / 18293 KC75                               |
| 140 | 202 | PBI09C034-BC-DH38 | PBW502 /2/PBW502 / 21758 KC75                               |
| 141 | 123 | PBI09C026-BC-DH16 | WAXWING*2/KIRITATI /3/WAXWING*2/KIRITATI /2/ 35888 M 500132 |
| 142 | 297 | PBI09C045-BC-DH19 | DBW16 /2/DBW16 / 18341 KC75                                 |
| 143 | 248 | PBI09C039-BC-DH37 | PBW550 /2/PBW550 / 18343 KC75                               |
| 144 | 59  | PBI09C009-BC-DH9  | SOKOLL/2/SOKOLL / 35888 M 500132                            |
| 145 | 236 | PBI09C038-BC-DH11 | PBW550 /2/PBW550 / 18293 KC75                               |
| 146 | 120 | PBI09C026-BC-DH13 | WAXWING*2/KIRITATI /3/WAXWING*2/KIRITATI /2/ 35888 M 500132 |
| 147 | 162 | PBI09C028-BC-DH15 | WAXWING*2/KIRITATI /3/WAXWING*2/KIRITATI /2/ 35888 M C18644 |
| 148 | 269 | PBI09C043-BC-DH21 | DBW16 /2/DBW16 / 21758 KC75                                 |
| 149 | 129 | PBI09C026-BC-DH30 | WAXWING*2/KIRITATI /3/WAXWING*2/KIRITATI /2/ 35888 M 500132 |
| 150 | 147 | PBI09C026-BC-DH68 | WAXWING*2/KIRITATI /3/WAXWING*2/KIRITATI /2/ 35888 M 500132 |
| 151 | 24  | PBI09C004-BC-DH36 | BERKUT/2/BERKUT / 35883 M500110                             |
| 152 | 240 | PBI09C038-BC-DH15 | PBW550 /2/PBW550 / 18293 KC75                               |
| 153 | 324 | PBI09C051-BC-DH3  | DBW17 /2/DBW17 / 18341 KC75                                 |
| 154 | 180 | PBI09C028-BC-DH47 | WAXWING*2/KIRITATI /3/WAXWING*2/KIRITATI /2/ 35880 M C18644 |
| 155 | 76  | PBI09C009-BC-DH49 | SOKOLL/2/SOKOLL / 35888 M 500132                            |
| 156 | 321 | PBI09C048-BC-DH36 | DBW17 /2/DBW17 / 21758 KC75                                 |
| 157 | 172 | PBI09C028-BC-DH34 | WAXWING*2/KIRITATI /3/WAXWING*2/KIRITATI /2/ 35880 M C18644 |
| 158 | 265 | PBI09C039-BC-DH87 | PBW550 /2/PBW550 / 18343 KC75                               |
| 159 | 92  | PBI09C009-BC-DH82 | SOKOLL/2/SOKOLL / 35888 M 500132                            |
| 160 | 111 | PBI09C026-BC-DH3  | WAXWING*2/KIRITATI /3/WAXWING*2/KIRITATI /2/ 35888 M 500132 |
| 161 | 209 | PBI09C035-BC-DH6  | PBW502 /2/PBW502 / 19385 KC75                               |
| 162 | 286 | PBI09C043-BC-DH63 | DBW16 /2/DBW16 / 21758 KC75                                 |
| 163 | 151 | PBI09C026-BC-DH86 | WAXWING*2/KIRITATI /3/WAXWING*2/KIRITATI /2/ 35888 M 500132 |
| 164 | 254 | PBI09C039-BC-DH55 | PBW550 /2/PBW550 / 18343 KC75                               |
| 165 | 166 | PBI09C028-BC-DH22 | WAXWING*2/KIRITATI /3/WAXWING*2/KIRITATI /2/ 35880 M C18644 |
| 166 | 305 | PBI09C048-BC-DH7  | DBW17 /2/DBW17 / 21758 KC75                                 |
| 167 | 282 | PBI09C043-BC-DH59 | DBW16 /2/DBW16 / 21758 KC75                                 |
| 168 | 243 | PBI09C039-BC-DH2  | PBW550 /2/PBW550 / 18343 KC75                               |
| 169 | 150 | PBI09C026-BC-DH85 | WAXWING*2/KIRITATI /3/WAXWING*2/KIRITATI /2/ 35888 M 500132 |
| 170 | 234 | PBI09C038-BC-DH5  | PBW550 /2/PBW550 / 18293 KC75                               |
| 171 | 176 | PBI09C028-BC-DH41 | WAXWING*2/KIRITATI /3/WAXWING*2/KIRITATI /2/ 35880 M C18644 |
| 172 | 115 | PBI09C026-BC-DH7  | WAXWING*2/KIRITATI /3/WAXWING*2/KIRITATI /2/ 35888 M 500132 |
| 173 | 23  | PBI09C004-BC-DH34 | BERKUT/2/BERKUT / 35883 M500110                             |
| 174 | 77  | PBI09C009-BC-DH51 | SOKOLL/2/SOKOLL / 35888 M 500132                            |
| 175 | 244 | PBI09C039-BC-DH12 | PBW550 /2/PBW550 / 18343 KC75                               |
| 176 | 250 | PBI09C039-BC-DH43 | PBW550 /2/PBW550 / 18343 KC75                               |
| 177 | 204 | PBI09C034-BC-DH41 | PBW502 /2/PBW502 / 21758 KC75                               |
| 178 | 117 | PBI09C026-BC-DH10 | WAXWING*2/KIRITATI /3/WAXWING*2/KIRITATI /2/ 35888 M 500132 |
| 179 | 264 | PBI09C039-BC-DH86 | PBW550 /2/PBW550 / 18343 KC75                               |
| 180 | 259 | PBI09C039-BC-DH70 | PBW550 /2/PBW550 / 18343 KC75                               |
| 181 | 152 | PBI09C026-BC-DH87 | WAXWING*2/KIRITATI /3/WAXWING*2/KIRITATI /2/ 35888 M 500132 |
| 182 | 118 | PBI09C026-BC-DH11 | WAXWING*2/KIRITATI /3/WAXWING*2/KIRITATI /2/ 35888 M 500132 |
| 183 | 311 | PBI09C048-BC-DH15 | DBW17 /2/DBW17 / 21758 KC75                                 |
| 184 | 181 | PBI09C028-BC-DH50 | WAXWING*2/KIRITATI /3/WAXWING*2/KIRITATI /2/ 35880 M C18644 |
| 185 | 75  | PBI09C009-BC-DH48 | SOKOLL/2/SOKOLL / 35888 M 500132                            |
| 186 | 124 | PBI09C026-BC-DH19 | WAXWING*2/KIRITATI /3/WAXWING*2/KIRITATI /2/ 35888 M 500132 |
| 187 | 207 | PBI09C035-BC-DH1  | PBW502 /2/PBW502 / 19385 KC75                               |
| 188 | 157 | PBI09C026-BC-DH97 | WAXWING*2/KIRITATI /3/WAXWING*2/KIRITATI /2/ 35888 M 500132 |
| 189 | 170 | PBI09C028-BC-DH31 | WAXWING*2/KIRITATI /3/WAXWING*2/KIRITATI /2/ 35880 M C18644 |
| 190 | 267 | PBI09C043-BC-DH4  | DBW16 /2/DBW16 / 21758 KC75                                 |
| 191 | 322 | PBI09C048-BC-DH37 | DBW17 /2/DBW17 / 21758 KC75                                 |
| 192 | 219 | PBI09C035-BC-DH19 | PBW502 /2/PBW502 / 19385 KC75                               |
| 193 | 211 | PBI09C035-BC-DH9  | PBW502 /2/PBW502 / 19385 KC75                               |
| 194 | 144 | PBI09C026-BC-DH57 | WAXWING*2/KIRITATI /3/WAXWING*2/KIRITATI /2/ 35888 M 500132 |
| 195 | 116 | PBI09C026-BC-DH9  | WAXWING*2/KIRITATI /3/WAXWING*2/KIRITATI /2/ 35888 M 500132 |
| 196 | 543 | Sunlin            | -                                                           |

Supplementary Table 2; Parameters of the logistic growth curves fitted to main spike dry weight (MSDW) data in Supplementary Figure 5 for two wheat genotypes (G1, putative heat tolerant; G2, putative heat susceptible) in response to day/night temperatures of CET1 (control, (22/14 °C)), CET2 (30/20 °C from heading), and CET3 (30/20 °C from anthesis). Where  $Y_{\max}$  is maximum MSDW,  $Y_0$  is starting MSDW at anthesis,  $k$  is the rate constant and  $X_{\text{int}}$  is the first inflection point. GxT, genotype by treatment interaction.

| GxT    | $Y_{\max}$ (g) | $Y_0$ (g) | $k$ (°Cd <sup>-1</sup> x 10 <sup>-3</sup> ) | $X_{\text{int}}$ (°Cd <sup>-1</sup> ) | $R^2$ |
|--------|----------------|-----------|---------------------------------------------|---------------------------------------|-------|
| G1CET1 | 7.84           | 0.89      | 3.9                                         | 253.3                                 | 0.94  |
| G2CET1 | 5.45           | 0.89      | 4.2                                         | 235.3                                 | 0.91  |
| G1CET2 | 3.45           | 0.89      | 4.6                                         | 218.5                                 | 0.94  |
| G2CET2 | 2.66           | 0.89      | 4.9                                         | 204.3                                 | 0.92  |
| G1CET3 | 4.06           | 0.89      | 4.4                                         | 228.9                                 | 0.96  |
| G2CET3 | 3.13           | 0.89      | 4.1                                         | 242.8                                 | 0.94  |

Supplementary Table 3; Parameters of the asymmetric Gompertz curves fitted to SPAD values in the glasshouse experiment of Figure 3 (GH) for two wheat genotypes (G1, putative heat tolerant; G2, putative heat susceptible) in response to day/night temperatures of CET1 (control, (22/14 °C)), CET2 (30/20 °C from heading), and CET3 (30/20 °C from anthesis). Where  $b$ ,  $c$ ,  $d$  and  $e$  are the slope around the inflection point, lower and upper asymptotes, and the midway point between  $c$  and  $d$ . The lower asymptote was constrained to zero and hence, is not included.

| GxT    | $b$ (SPAD °Cd <sup>-1</sup> ) | $d$ (°Cd <sup>-1</sup> ) | $e$ (°Cd <sup>-1</sup> ) | $R^2$  |
|--------|-------------------------------|--------------------------|--------------------------|--------|
| G1CET1 | -0.009682                     | 52.72                    | 367.1                    | 0.9756 |
| G2CET1 | -0.01165                      | 51.82                    | 354                      | 0.9787 |
| G1CET2 | -0.00553                      | 53.02                    | 297.6                    | 0.9785 |
| G2CET2 | -0.006232                     | 54.85                    | 222.3                    | 0.9841 |
| G1CET3 | -0.005336                     | 53.39                    | 311.2                    | 0.9843 |
| G2CET3 | -0.006148                     | 53.78                    | 256.3                    | 0.9825 |

Supplementary Table 4; Parameters of the best fit linear regression curves fitted to green leaf area (GLA) overtime in the glasshouse experiment of Supplementary Figure 6 for two wheat genotypes (G1, putative heat tolerant; G2, putative heat susceptible) in response to day/night temperatures of CET1 (control, (22/14 °C)), CET2 (30/20 °C from heading), and CET3 (30/20 °C from anthesis).

| GxT  | GLA Intercept (cm <sup>2</sup> ) | Slope (cm <sup>2</sup> °Cd <sup>-1</sup> ) |
|------|----------------------------------|--------------------------------------------|
| G1T1 | 1028.1                           | -1.133                                     |
| G2T1 | 1002.2                           | -1.300                                     |
| G1T2 | 914.1                            | -1.211                                     |
| G2T2 | 844.9                            | -1.197                                     |
| G1T3 | 921.5                            | -1.130                                     |
| G2T3 | 913.4                            | -1.274                                     |

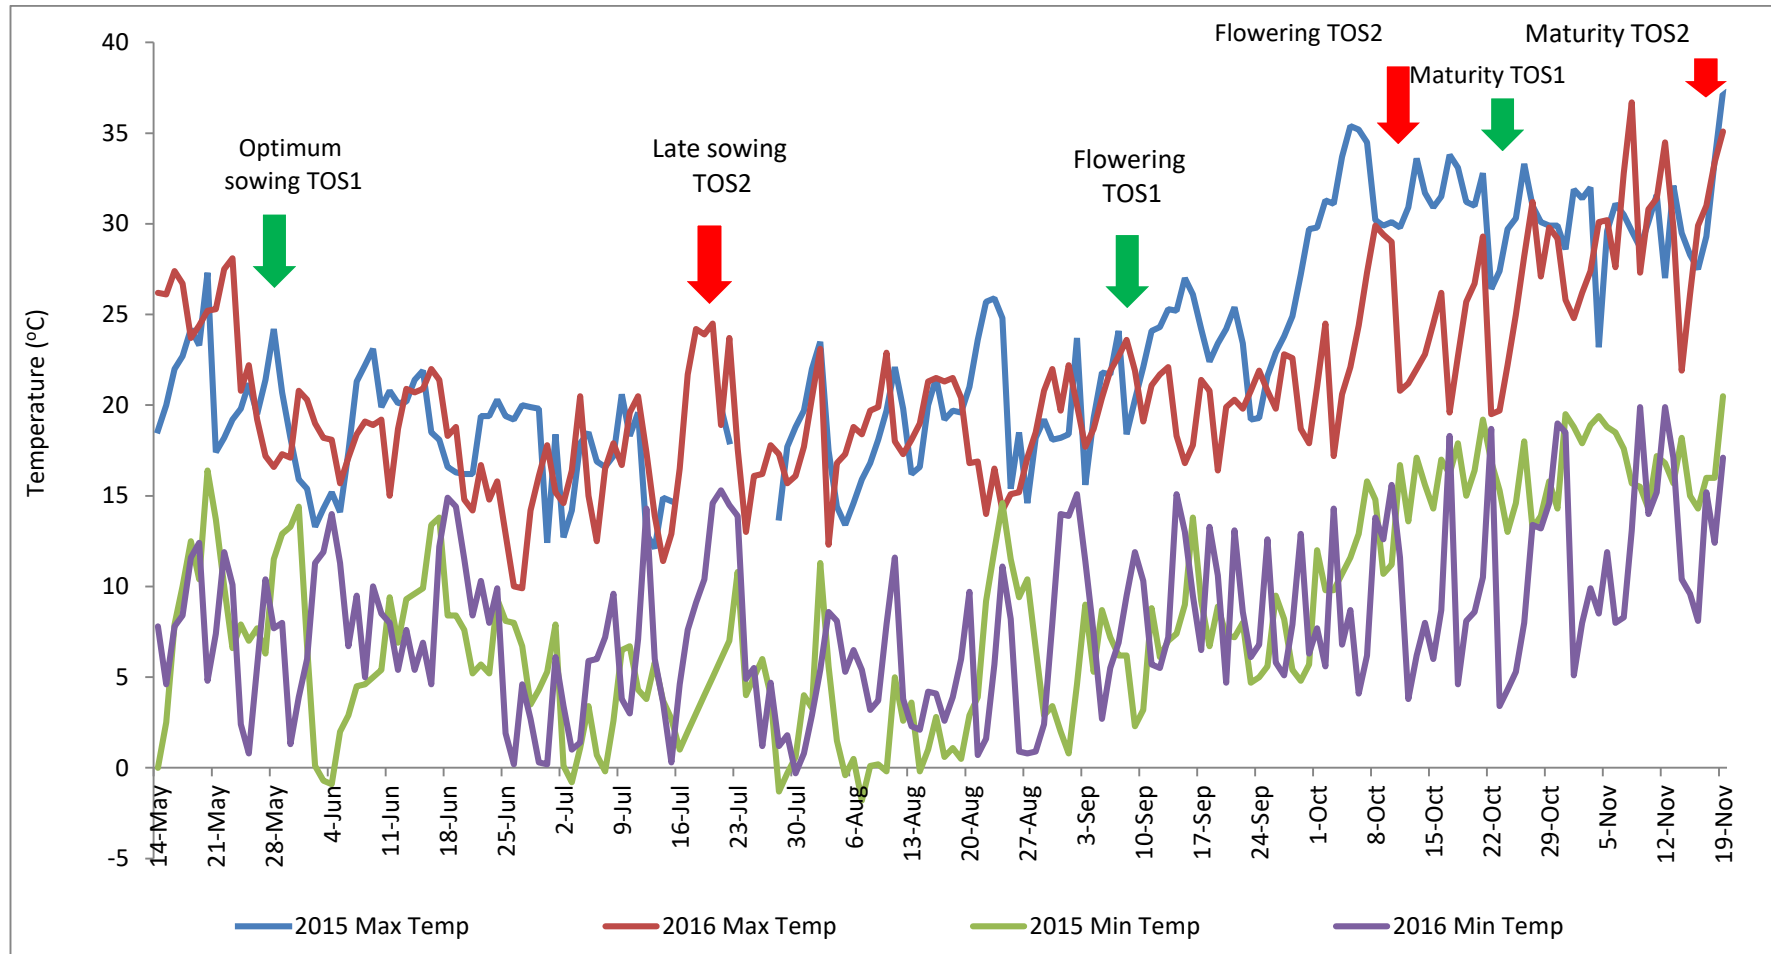

**Supplementary Figure 1.** Daily maximum and minimum temperature during crop growth (including both times of sowing (TOS)) in the 2015 and 2016 field trials at Narrabri. The arrows indicate timing of sowing, and average reproductive stage and physiological maturity for the optimal (TOS1) and late (TOS2) sowing dates.

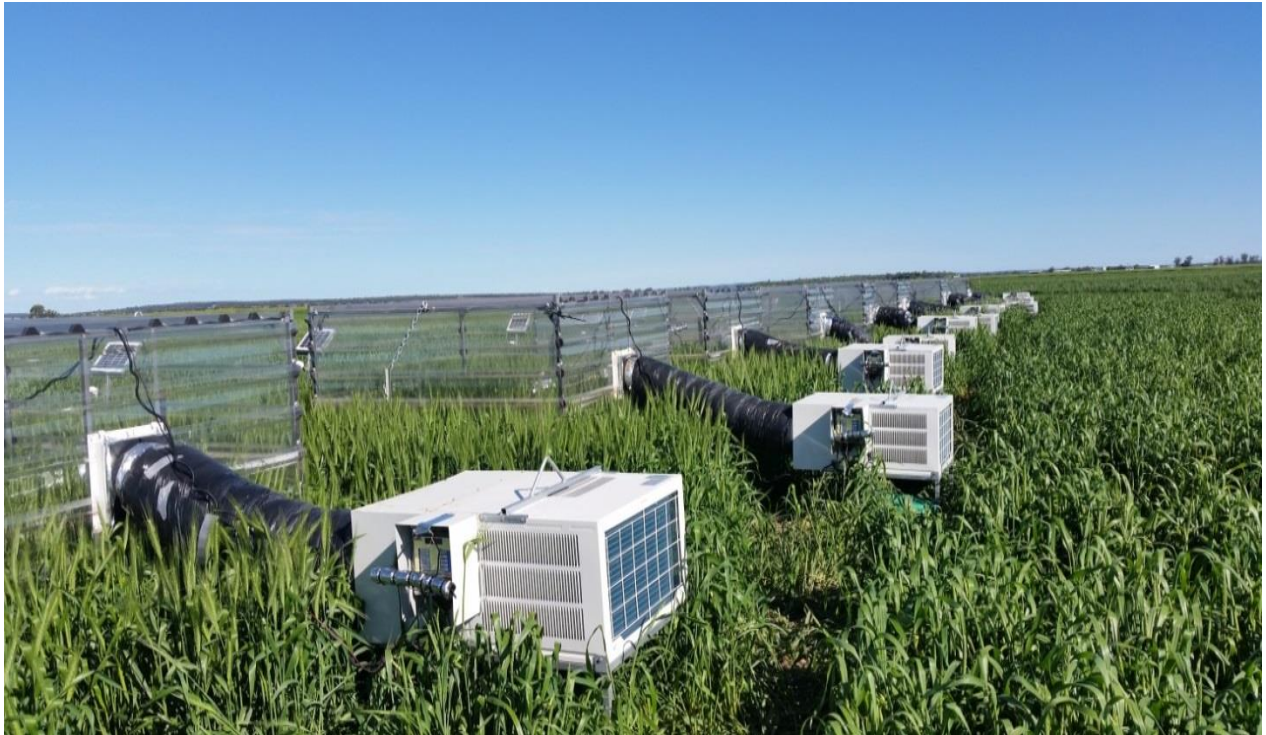

**Supplementary Figure 2.** Field view of the chambers used to impose heat stress at anthesis during 2016. Set temperatures were achieved using reverse cycle air conditioners (3.9 kW heating and 3.6 kW cooling) powered by heavy voltage generators (15 kVA 3 phase) and controlled using SPLAT (HVAC26A) controllers attached to each unit. Weather-proof temperature and humidity data loggers (HOBO® U23, Pro v2) were used to monitor conditions in each chamber.

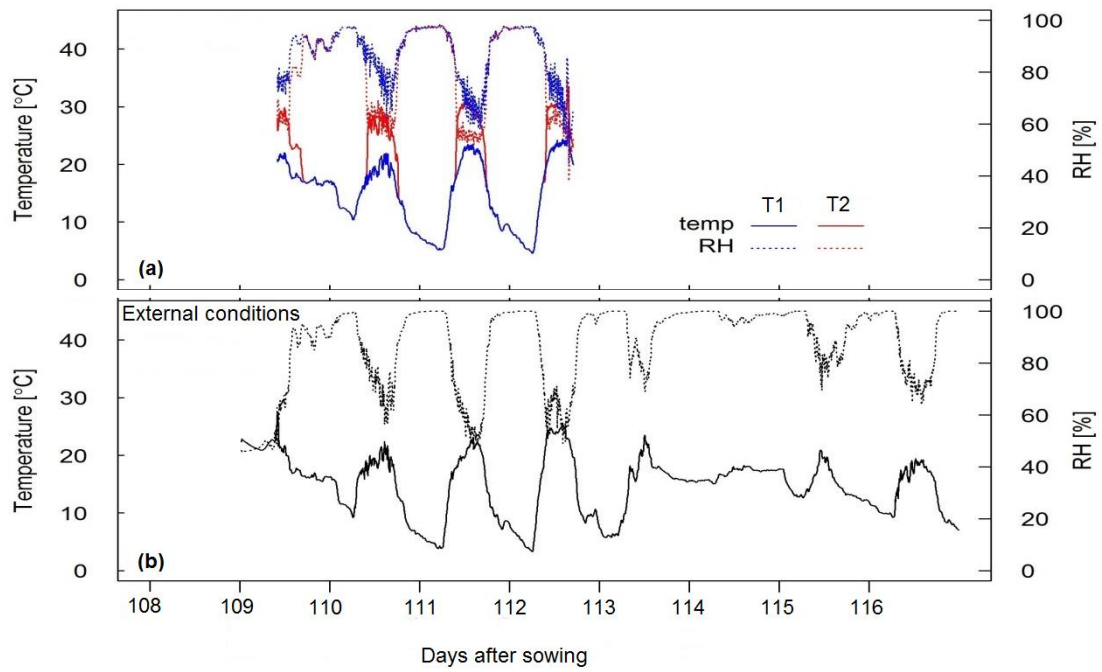

**Supplementary Figure 3.** Air temperature and relative humidity (RH) inside the heat chambers for the ambient (T1) and heated (T2) treatments (a) compared with external ambient conditions (b). Solid lines represent temperature and dashed lines represent RH.

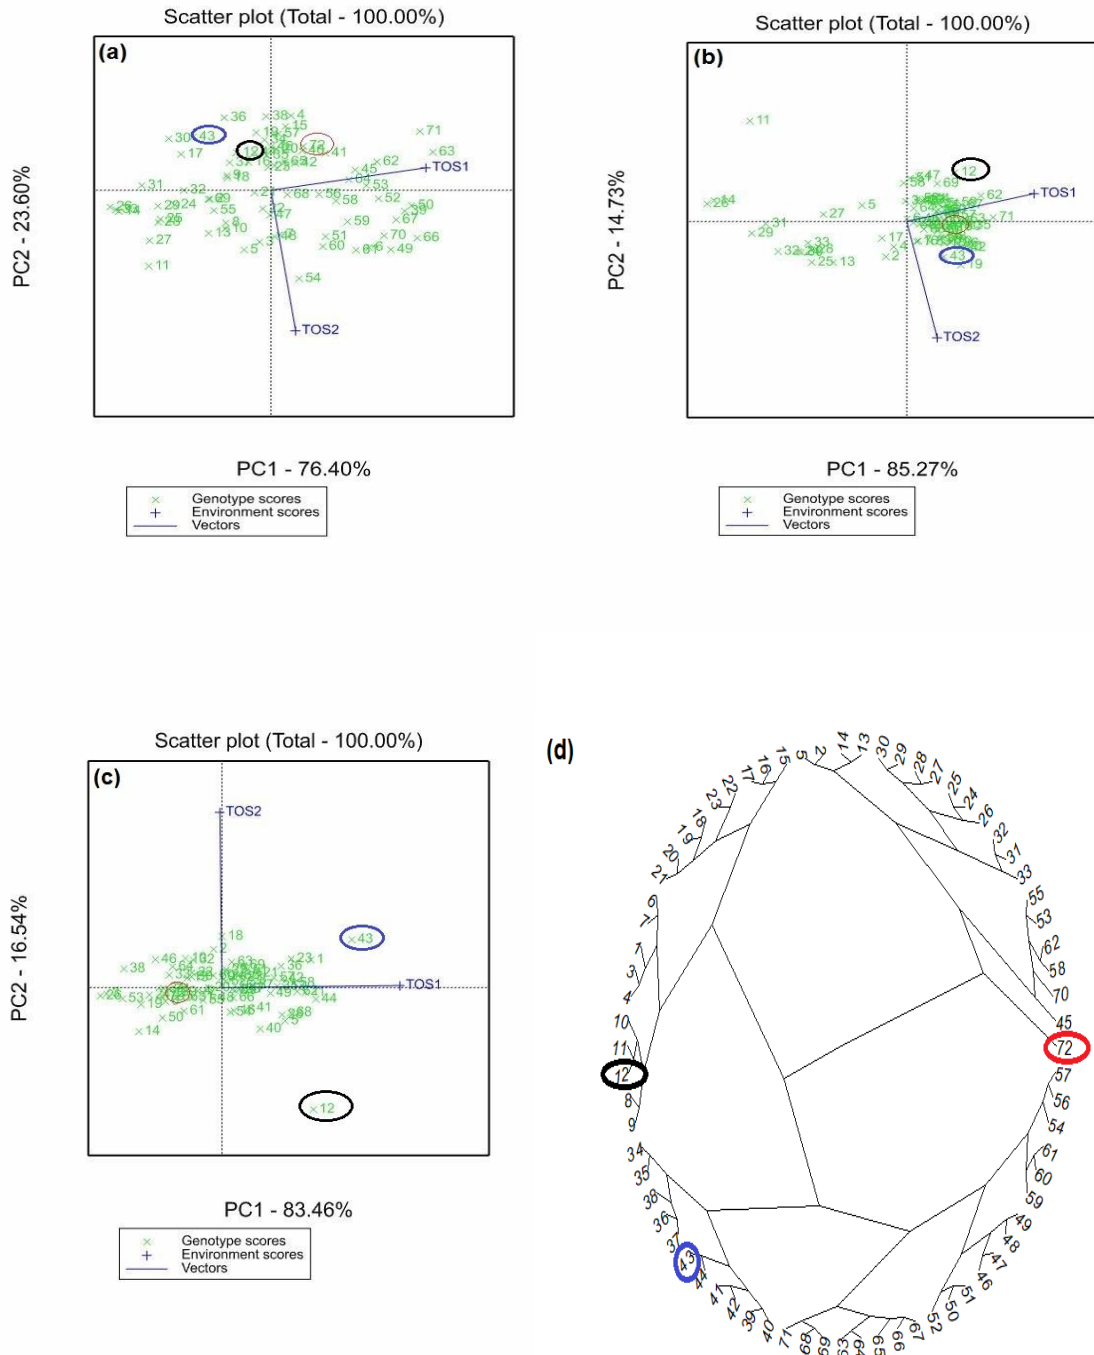

**Supplementary Figure 4;** Comparison of recurrent parent PBW 502 (#72 encircled red) and progenies including stable G1 (#43 encircled blue) and unstable G2 (#12 encircled black) emmer derived field selected lines based on mean performance and stability across the two environments i.e. normal and heat stressed for (a) screening percentages, (b) TKW, (c) and grain yield, and (d) dendrogram demonstrating the genetic distance between the recurrent hexaploid parents and progenies (n = 72). PBW502, G1 and G2 emmer derived lines are indicated with the same coloured circles as in the GGE biplots.



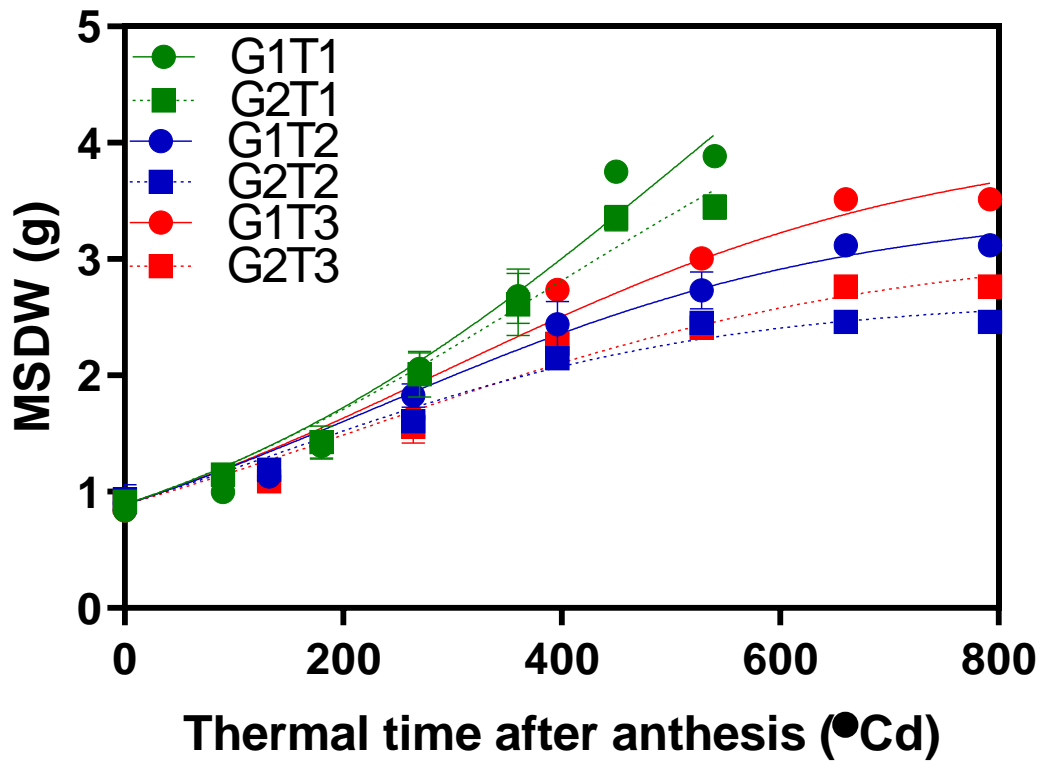

**Supplementary Figure 5.** Change in mean main spike dry weight (MSDW) over time for two wheat genotypes (G1, putative heat tolerant (circles and solid lines); G2, putative heat susceptible (squares and dashed lines)) in response to day/night temperatures of T1 (control, (22/14 °C)), T2 (30/20 °C from heading), and T3 (30/20 °C from anthesis) under controlled environment conditions. Error bars represent SEM, n = 4. The parameters for the logistic growth curves best fit to the data are shown in Supplementary Table 2.

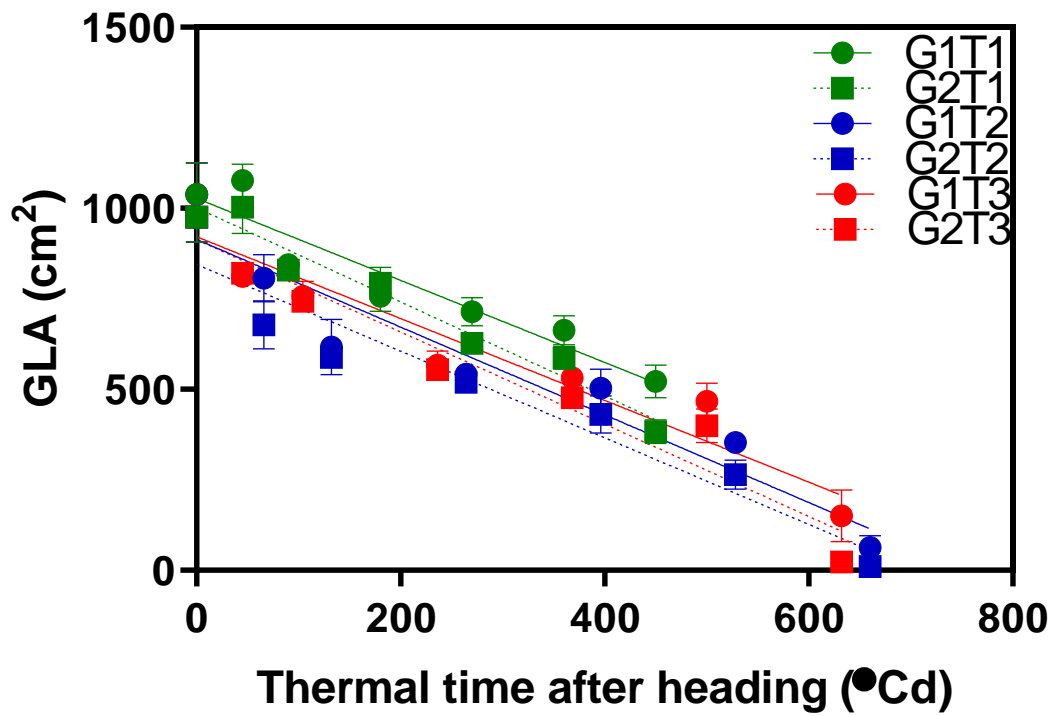

**Supplementary Figure 6.** Change in mean green leaf area (GLA) over time for two wheat genotypes (G1, putative heat tolerant (circles and solid lines); G2, putative heat susceptible (squares and dashed lines)) in response to day/night temperatures of T1 (control, (22/14 °C)), T2 (30/20 °C from heading), and T3 (30/20 °C from anthesis) under controlled environment conditions (GH). Error bars represent  $\pm 1$  SEM,  $n = 4$ . Data were best fit by linear regression with the parameters shown in Supplementary Table 4.

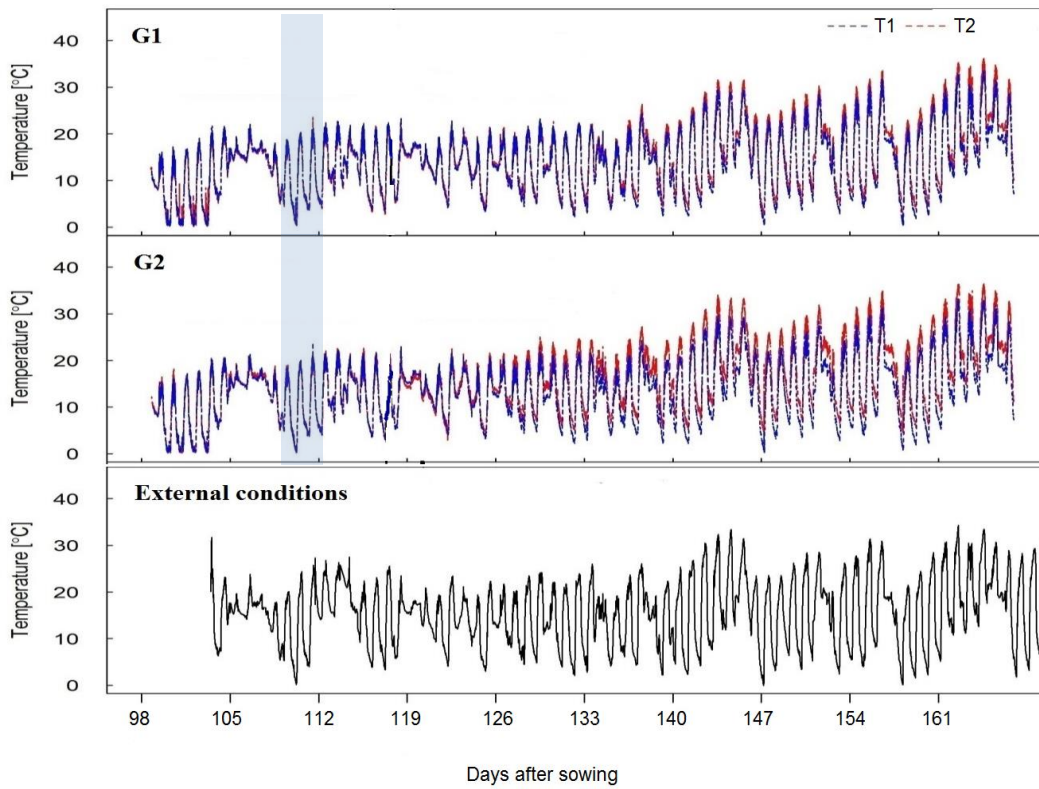

**Supplementary Figure 7.** Canopy temperature ( $^{\circ}\text{C}$ ) of genotypes assessed from booting to physiological maturity exposed to ambient (T1, blue lines) and heated (T2, red lines) chambers for 4 days from anthesis (110 days after sowing). The shaded portion in the upper two panels indicates when the heat chambers were applied.
